# Supplementary material for: Genetic Background Drives Transcriptional Variation in Human Induced Pluripotent Stem Cells
Source: PubMed Central journal article supplement (PMC4046971; doi:10.1371/journal.pgen.1004432), 2014-06-05

F-iPSC\_S2\_1

F-iPSC\_S2\_2

SeV O S K M

SeV O S K M

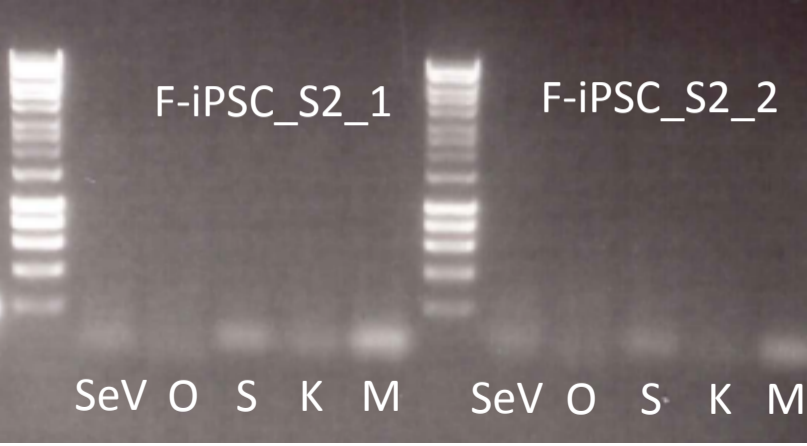

Supplement: pgen.1004432.s002.pdf [file pgen.1004432.s002.pdf]
