# Supplementary material for: Genetic Background Drives Transcriptional Variation in Human Induced Pluripotent Stem Cells
Source: PubMed Central journal article supplement (PMC4046971; doi:10.1371/journal.pgen.1004432), 2014-06-05

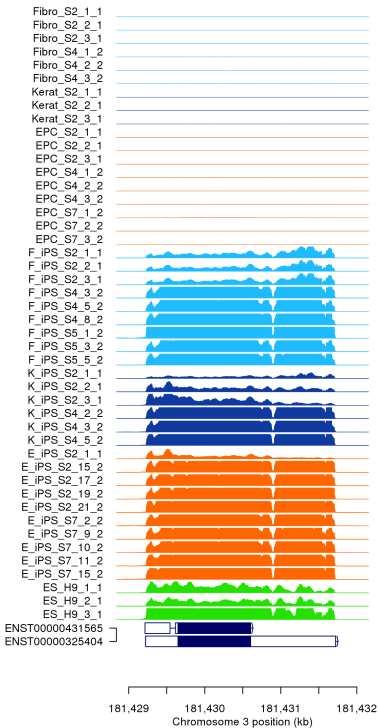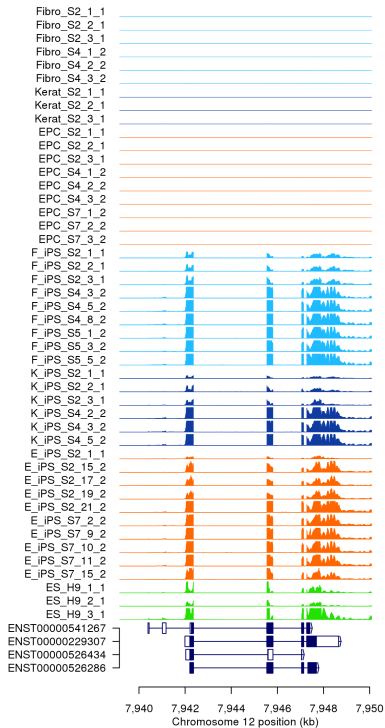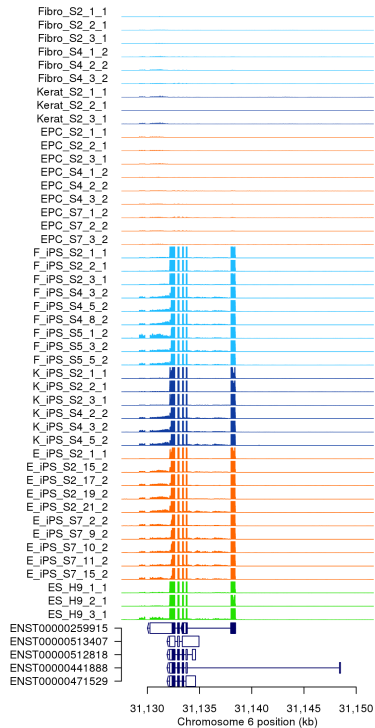

Supplement: pgen.1004432.s012.pdf [file pgen.1004432.s012.pdf]
